# Supplementary material for: Modeling of Gap Gene Expression in Drosophila Kruppel Mutants
Source: PubMed Central journal article supplement (PMC3426564; doi:10.1371/journal.pcbi.1002635), 2012-08-23
Supplement: pcbi.1002635.s003.pdf [file pcbi.1002635.s003.pdf]

Estimate of regulatory weight

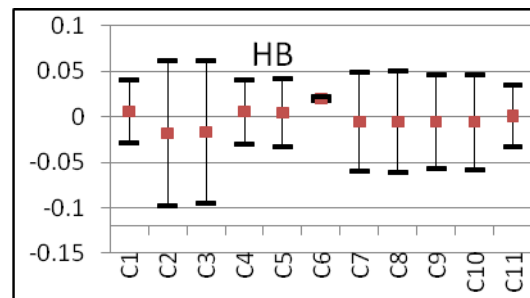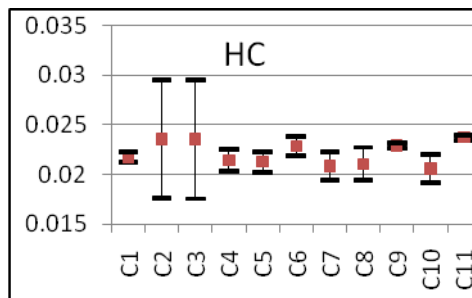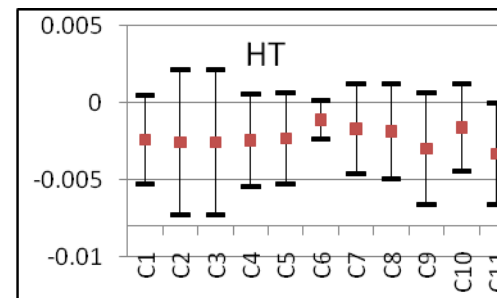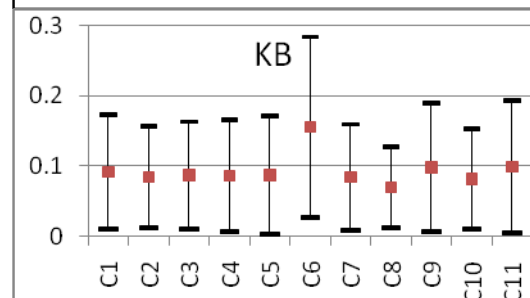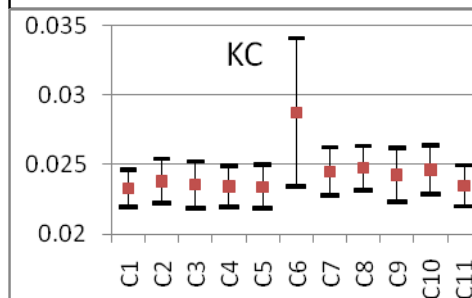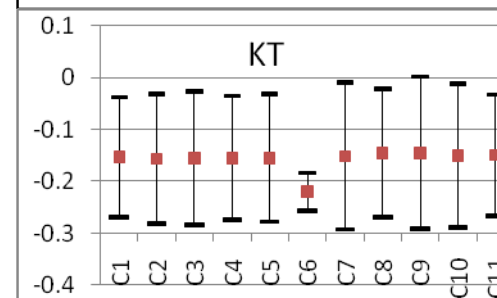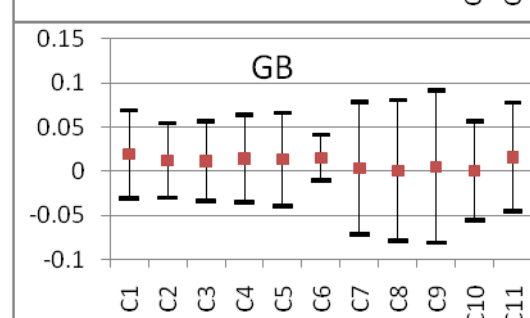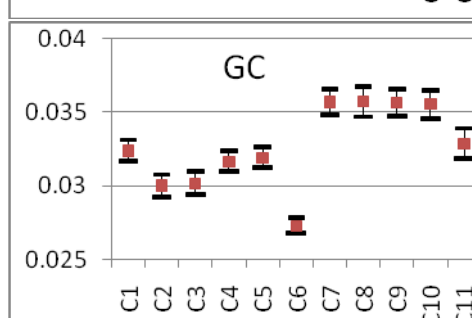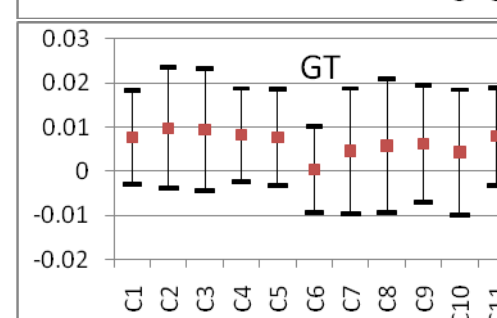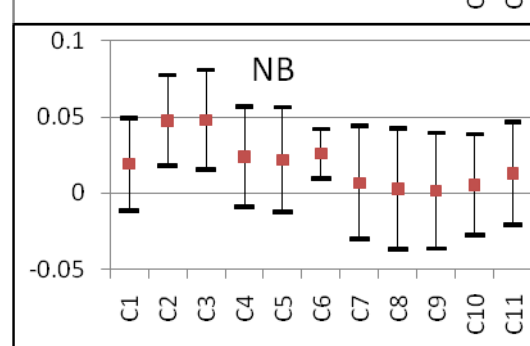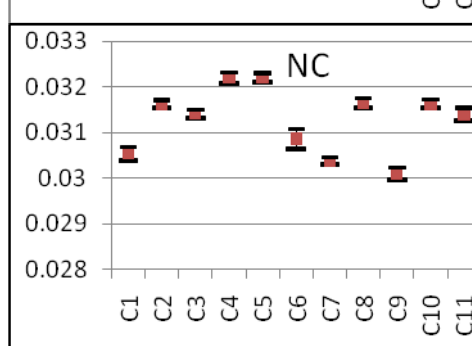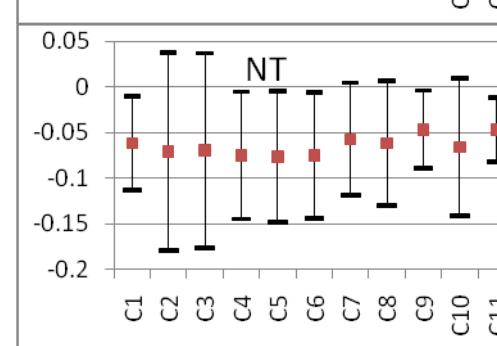

Circuits
