# Supplementary material for: Some open problems in nuclear physics
Source: PLOS journal article supplement (doi:10.1371/journal.pcbi.1002635), 1966-01-01
Supplement: S7 (10.1371/journal.pcbi.1002635.s007) [file journal.pcbi.1002635.s007.pdf › journal.pcbi.1002635.s007.pdf]

| Target     | R      | <i>hb</i> | <i>Kr</i> | <i>gt</i> | <i>kni</i> | <i>bcd</i> | <i>cad</i> | <i>tll</i> | h      | D     | $t_{1/2} = \log(2) / \lambda$ |
|------------|--------|-----------|-----------|-----------|------------|------------|------------|------------|--------|-------|-------------------------------|
| <i>hb</i>  | 20.000 | 0.026     | -0.237    | 0.017     | -0.104     | -0.009     | 0.026      | -0.004     | -3.500 | 0.895 | 5.569                         |
| <i>Kr</i>  | 20.000 | -0.055    | 0.029     | -0.005    | -0.018     | 0.108      | 0.022      | -0.156     | -3.500 | 0.519 | 7.176                         |
| <i>gt</i>  | 10.000 | -0.251    | -0.072    | 0.036     | -0.008     | 0.015      | 0.036      | 0.006      | -3.500 | 0.280 | 15.507                        |
| <i>kni</i> | 18.162 | -0.128    | -0.016    | -0.050    | 0.036      | 0.006      | 0.031      | -0.031     | -3.500 | 0.627 | 9.358                         |
