# Supplementary material for: Modeling of Gap Gene Expression in Drosophila Kruppel Mutants
Source: PLoS Comput Biol. 2012 Aug 23;8(8):e1002635. doi: 10.1371/journal.pcbi.1002635 (PMC3426564; doi:10.1371/journal.pcbi.1002635)
Supplement: Table S2 — Circuit parameter sets: 11 sets of parameter values that optimize the transformed functional. Regulatory weights are labeled by single-letter notations of genes: hb(H), Kr(K), gt(G), kni(N), bcd(B), cad(C), tll(T). (PDF) [file pcbi.1002635.s008.pdf]

| $\Theta^{hb}$  | $T^{HH}$ | $T^{HK}$ | $T^{HG}$ | $T^{HN}$ | $E_H^B$ | $E_H^C$ | $E_H^T$ | $R_{hb}$  | $D^{hb}$  | $\lambda^{hb}$  |
|----------------|----------|----------|----------|----------|---------|---------|---------|-----------|-----------|-----------------|
| C1             | 0.029    | -0.206   | 0.014    | -0.083   | 0.006   | 0.022   | -0.002  | 19.93     | 0.819     | 0.122           |
| C2             | 0.025    | -0.198   | 0.018    | -0.090   | -0.019  | 0.024   | -0.003  | 10.00     | 0.325     | 0.051           |
| C3             | 0.026    | -0.200   | 0.018    | -0.091   | -0.017  | 0.024   | -0.003  | 10.00     | 0.324     | 0.051           |
| C4             | 0.030    | -0.205   | 0.015    | -0.083   | 0.005   | 0.021   | -0.002  | 19.84     | 0.834     | 0.120           |
| C5             | 0.030    | -0.205   | 0.014    | -0.081   | 0.005   | 0.021   | -0.002  | 19.87     | 0.848     | 0.121           |
| C6             | 0.053    | -0.149   | 0.004    | -0.042   | 0.020   | 0.023   | -0.001  | 10.02     | 0.181     | 0.133           |
| C7             | 0.029    | -0.205   | 0.013    | -0.071   | -0.005  | 0.021   | -0.002  | 19.71     | 0.542     | 0.115           |
| C8             | 0.028    | -0.196   | 0.014    | -0.079   | -0.006  | 0.021   | -0.002  | 19.82     | 0.543     | 0.114           |
| C9             | 0.028    | -0.226   | 0.014    | -0.094   | -0.005  | 0.023   | -0.003  | 20.00     | 0.876     | 0.111           |
| C10            | 0.029    | -0.205   | 0.013    | -0.070   | -0.006  | 0.021   | -0.002  | 19.69     | 0.528     | 0.116           |
| C11            | 0.027    | -0.221   | 0.014    | -0.097   | 0.001   | 0.024   | -0.003  | 20.00     | 0.911     | 0.116           |
| $\Theta^{Kr}$  | $T^{KH}$ | $T^{KK}$ | $T^{KG}$ | $T^{KN}$ | $E_K^B$ | $E_K^C$ | $E_K^T$ | $R_{Kr}$  | $D^{Kr}$  | $\lambda^{Kr}$  |
| C1             | -0.045   | 0.036    | -0.007   | -0.025   | 0.092   | 0.023   | -0.153  | 19.93     | 0.318     | 0.103           |
| C2             | -0.050   | 0.055    | -0.001   | -0.040   | 0.084   | 0.024   | -0.157  | 19.87     | 0.425     | 0.105           |
| C3             | -0.050   | 0.052    | -0.001   | -0.038   | 0.087   | 0.024   | -0.155  | 19.95     | 0.430     | 0.105           |
| C4             | -0.044   | 0.041    | -0.004   | -0.029   | 0.086   | 0.023   | -0.155  | 19.86     | 0.353     | 0.102           |
| C5             | -0.043   | 0.039    | -0.006   | -0.027   | 0.087   | 0.023   | -0.155  | 19.93     | 0.344     | 0.103           |
| C6             | -0.098   | 0.009    | -0.147   | -0.003   | 0.155   | 0.029   | -0.220  | 20.00     | 0.294     | 0.090           |
| C7             | -0.030   | 0.027    | -0.018   | -0.016   | 0.084   | 0.024   | -0.151  | 20.00     | 0.255     | 0.104           |
| C8             | -0.017   | 0.029    | -0.020   | -0.018   | 0.070   | 0.025   | -0.146  | 19.77     | 0.257     | 0.103           |
| C9             | -0.045   | 0.023    | -0.022   | -0.014   | 0.098   | 0.024   | -0.146  | 19.93     | 0.187     | 0.102           |
| C10            | -0.028   | 0.027    | -0.019   | -0.017   | 0.081   | 0.025   | -0.151  | 19.92     | 0.256     | 0.104           |
| C11            | -0.052   | 0.033    | -0.008   | -0.022   | 0.099   | 0.023   | -0.150  | 19.90     | 0.262     | 0.104           |
| $\Theta^{gt}$  | $T^{GH}$ | $T^{GK}$ | $T^{GG}$ | $T^{GN}$ | $E_G^B$ | $E_G^C$ | $E_G^T$ | $R_{gt}$  | $D^{gt}$  | $\lambda^{gt}$  |
| C1             | -0.247   | -0.051   | 0.040    | -0.012   | 0.019   | 0.032   | 0.008   | 13.45     | 0.414     | 0.065           |
| C2             | -0.234   | -0.043   | 0.040    | -0.013   | 0.012   | 0.030   | 0.010   | 15.32     | 0.616     | 0.069           |
| C3             | -0.235   | -0.044   | 0.040    | -0.013   | 0.011   | 0.030   | 0.009   | 15.17     | 0.614     | 0.069           |
| C4             | -0.237   | -0.050   | 0.040    | -0.013   | 0.014   | 0.032   | 0.008   | 14.00     | 0.471     | 0.066           |
| C5             | -0.239   | -0.050   | 0.040    | -0.013   | 0.013   | 0.032   | 0.008   | 13.81     | 0.471     | 0.065           |
| C6             | -0.177   | -0.050   | 0.030    | -0.010   | 0.015   | 0.027   | 0.000   | 20.00     | 0.840     | 0.082           |
| C7             | -0.265   | -0.054   | 0.041    | -0.011   | 0.003   | 0.036   | 0.005   | 10.00     | 0.232     | 0.054           |
| C8             | -0.271   | -0.058   | 0.039    | -0.011   | 0.001   | 0.036   | 0.006   | 10.36     | 0.270     | 0.049           |
| C9             | -0.240   | -0.063   | 0.036    | -0.007   | 0.005   | 0.036   | 0.006   | 10.01     | 0.174     | 0.054           |
| C10            | -0.261   | -0.054   | 0.041    | -0.011   | 0.000   | 0.036   | 0.004   | 10.00     | 0.255     | 0.054           |
| C11            | -0.230   | -0.057   | 0.036    | -0.011   | 0.016   | 0.033   | 0.008   | 13.55     | 0.406     | 0.065           |
| $\Theta^{kni}$ | $T^{NH}$ | $T^{NK}$ | $T^{NG}$ | $T^{NN}$ | $E_N^B$ | $E_N^C$ | $E_N^T$ | $R_{kni}$ | $D^{kni}$ | $\lambda^{kni}$ |
| C1             | -0.144   | -0.014   | -0.045   | 0.035    | 0.019   | 0.031   | -0.062  | 20.00     | 0.668     | 0.089           |
| C2             | -0.168   | -0.011   | -0.048   | 0.031    | 0.048   | 0.032   | -0.071  | 15.81     | 0.477     | 0.067           |
| C3             | -0.166   | -0.011   | -0.047   | 0.031    | 0.048   | 0.031   | -0.070  | 15.96     | 0.481     | 0.067           |
| C4             | -0.155   | -0.014   | -0.054   | 0.036    | 0.024   | 0.032   | -0.075  | 16.78     | 0.542     | 0.073           |
| C5             | -0.154   | -0.014   | -0.053   | 0.035    | 0.022   | 0.032   | -0.077  | 16.87     | 0.545     | 0.074           |
| C6             | -0.105   | -0.017   | -0.064   | 0.035    | 0.026   | 0.031   | -0.075  | 16.60     | 0.545     | 0.065           |
| C7             | -0.137   | -0.012   | -0.034   | 0.033    | 0.007   | 0.030   | -0.057  | 19.92     | 0.589     | 0.091           |
| C8             | -0.140   | -0.012   | -0.042   | 0.035    | 0.003   | 0.032   | -0.062  | 16.96     | 0.529     | 0.079           |
| C9             | -0.117   | -0.013   | -0.041   | 0.038    | 0.002   | 0.030   | -0.047  | 18.14     | 0.617     | 0.084           |
| C10            | -0.144   | -0.012   | -0.039   | 0.034    | 0.005   | 0.032   | -0.066  | 17.35     | 0.505     | 0.079           |
| C11            | -0.131   | -0.015   | -0.053   | 0.038    | 0.013   | 0.031   | -0.047  | 17.74     | 0.600     | 0.080           |
